# Supplementary material for: Disruption of the Mammalian Ccr4–Not Complex Contributes to Transcription-Mediated Genome Instability
Source: MDPI journal article supplement (doi:10.3390/cells12141868), 2023-07-17

## Supplementary Figure S1

A)

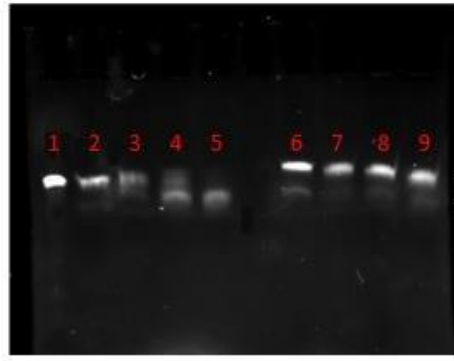

Upper band: intact ribonucleotide  
Lower band: deadenylated ribonucleotide

B)

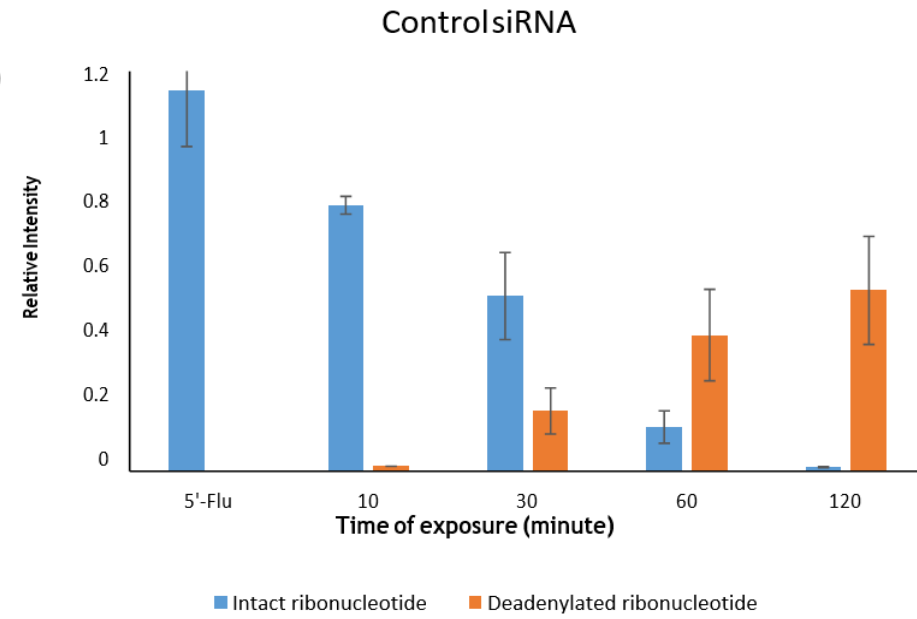

C)

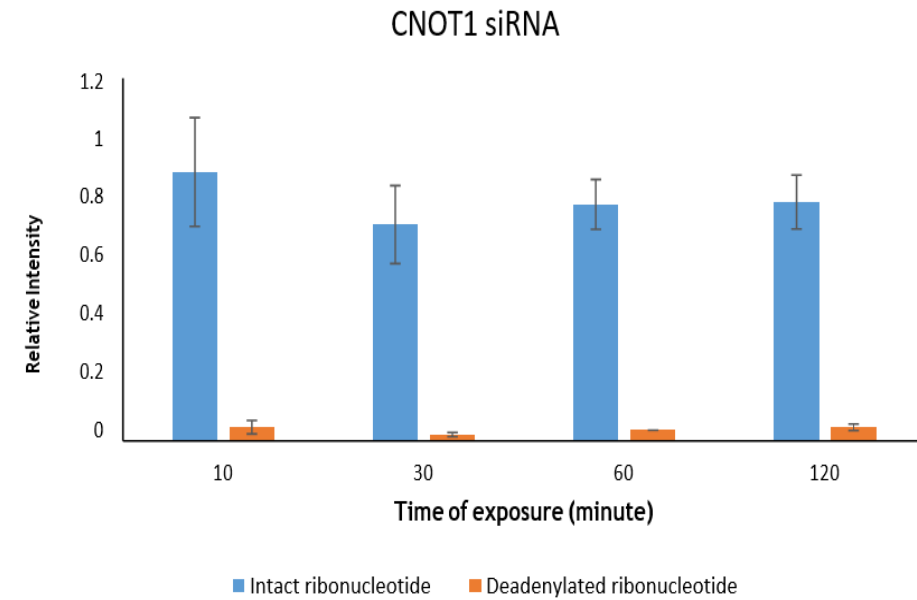

Supplementary Figure S2

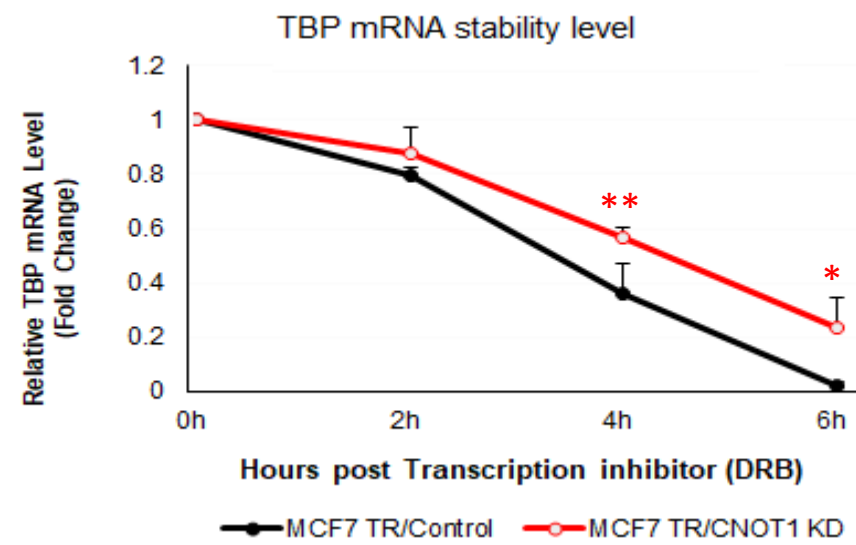

Supplementary Figure S3

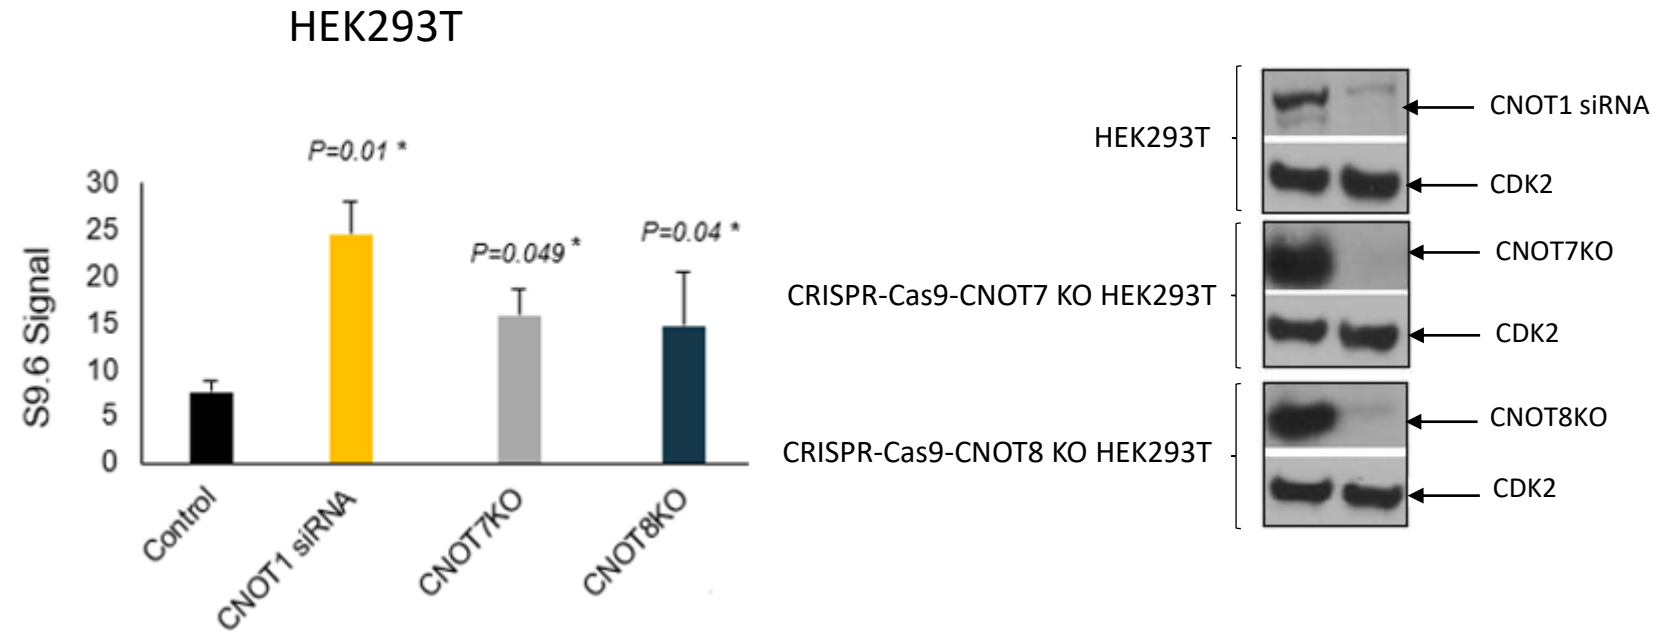

Supplementary Figure S4

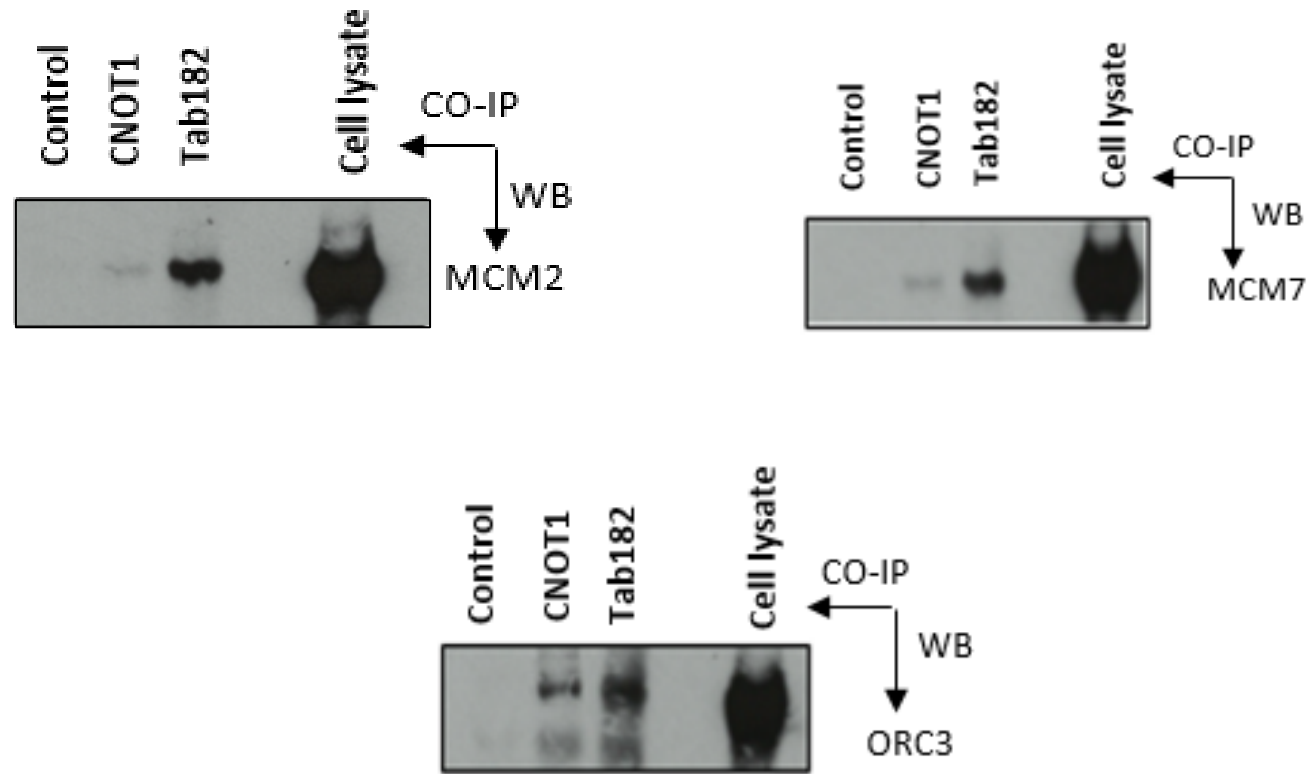

Supplementary Figure S5

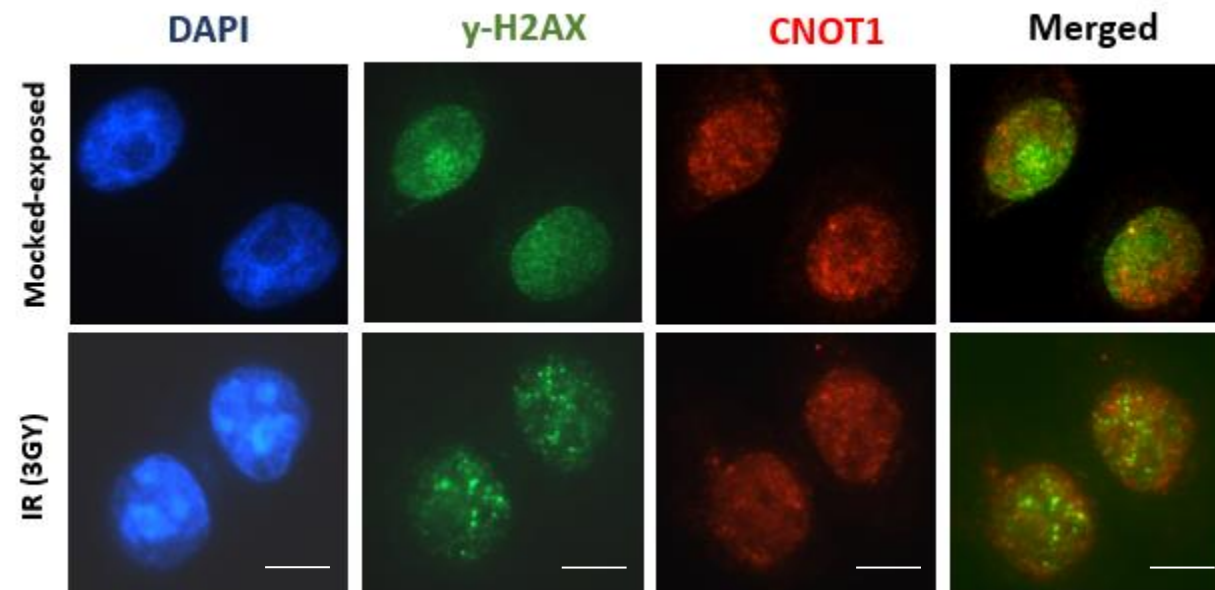

## Supplementary Figure S6

A)

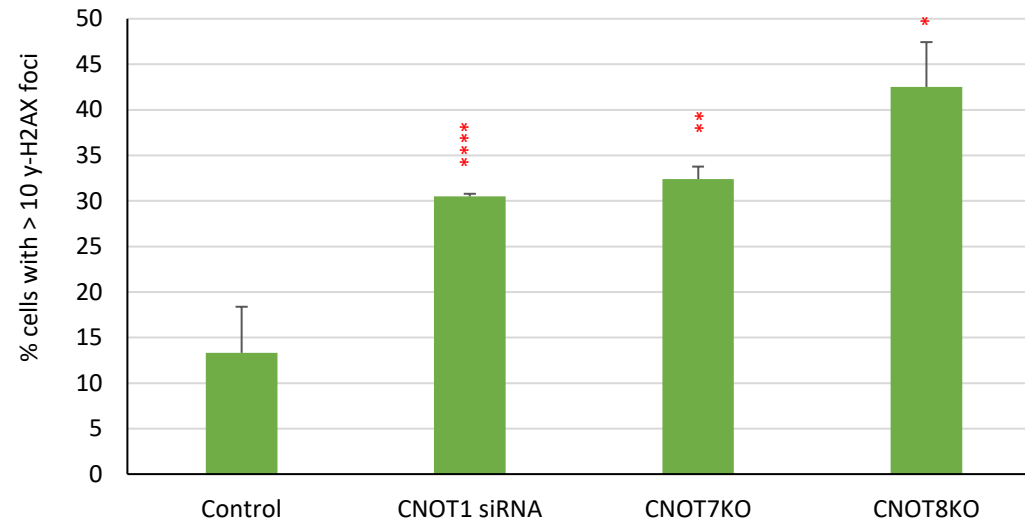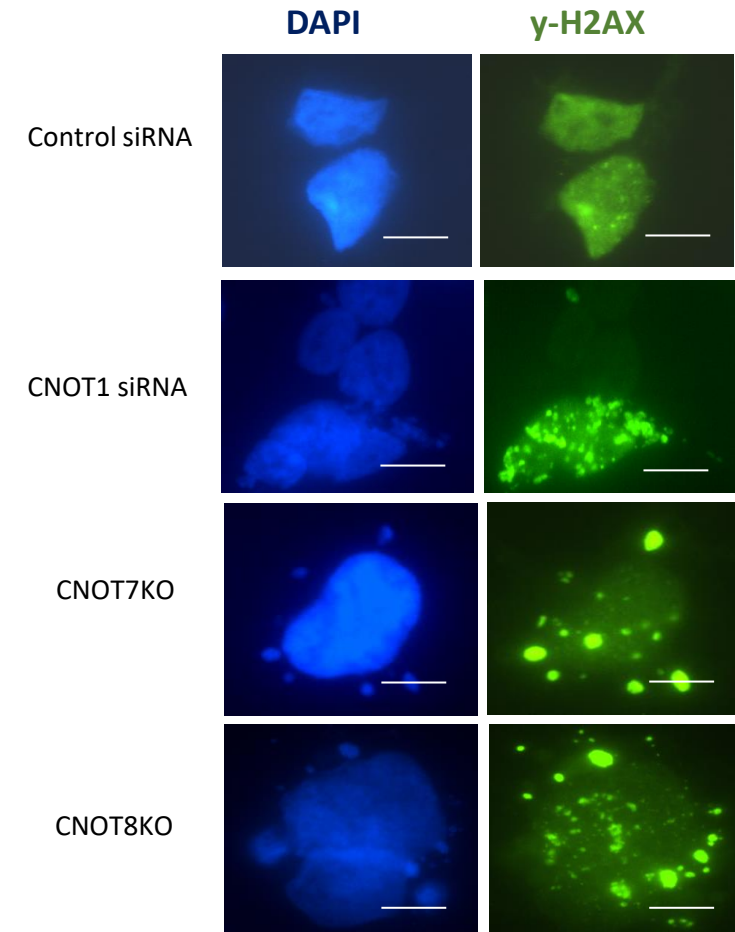

B)

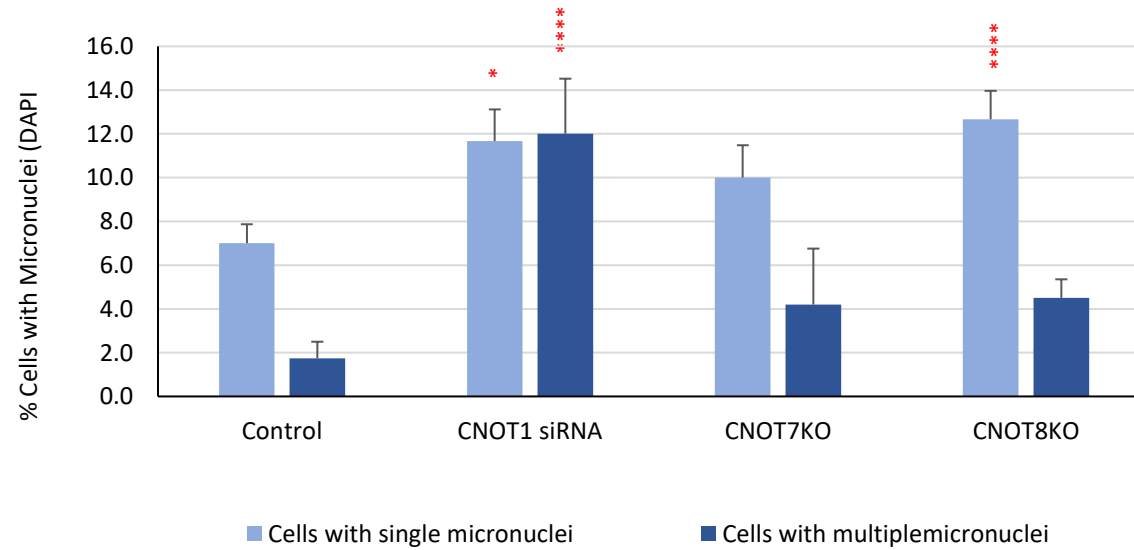

Supplementary Figure S6

C)

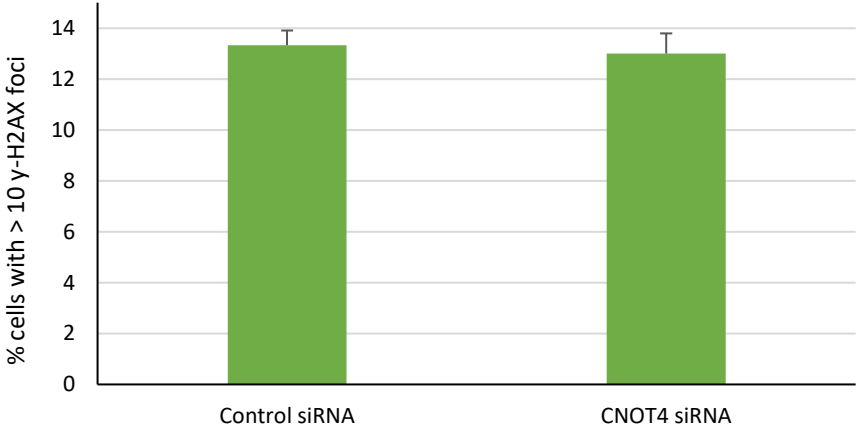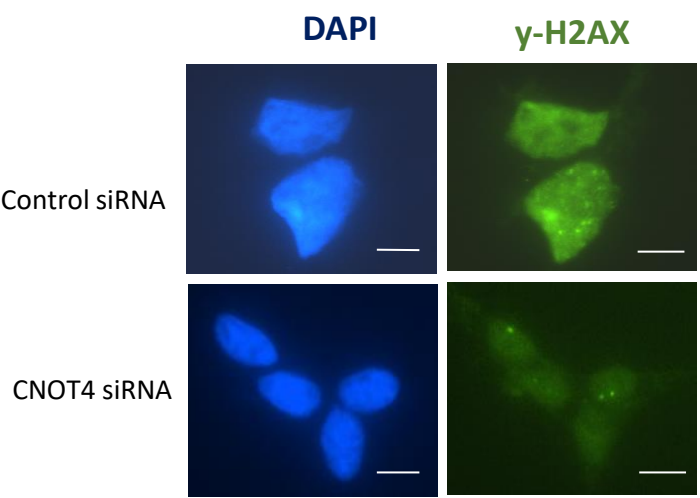

D)

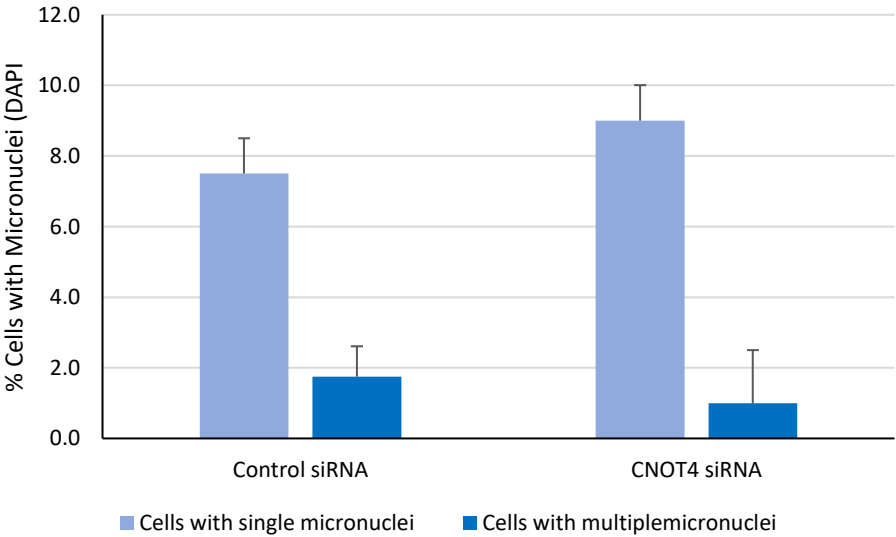

Supplementary Figure S7

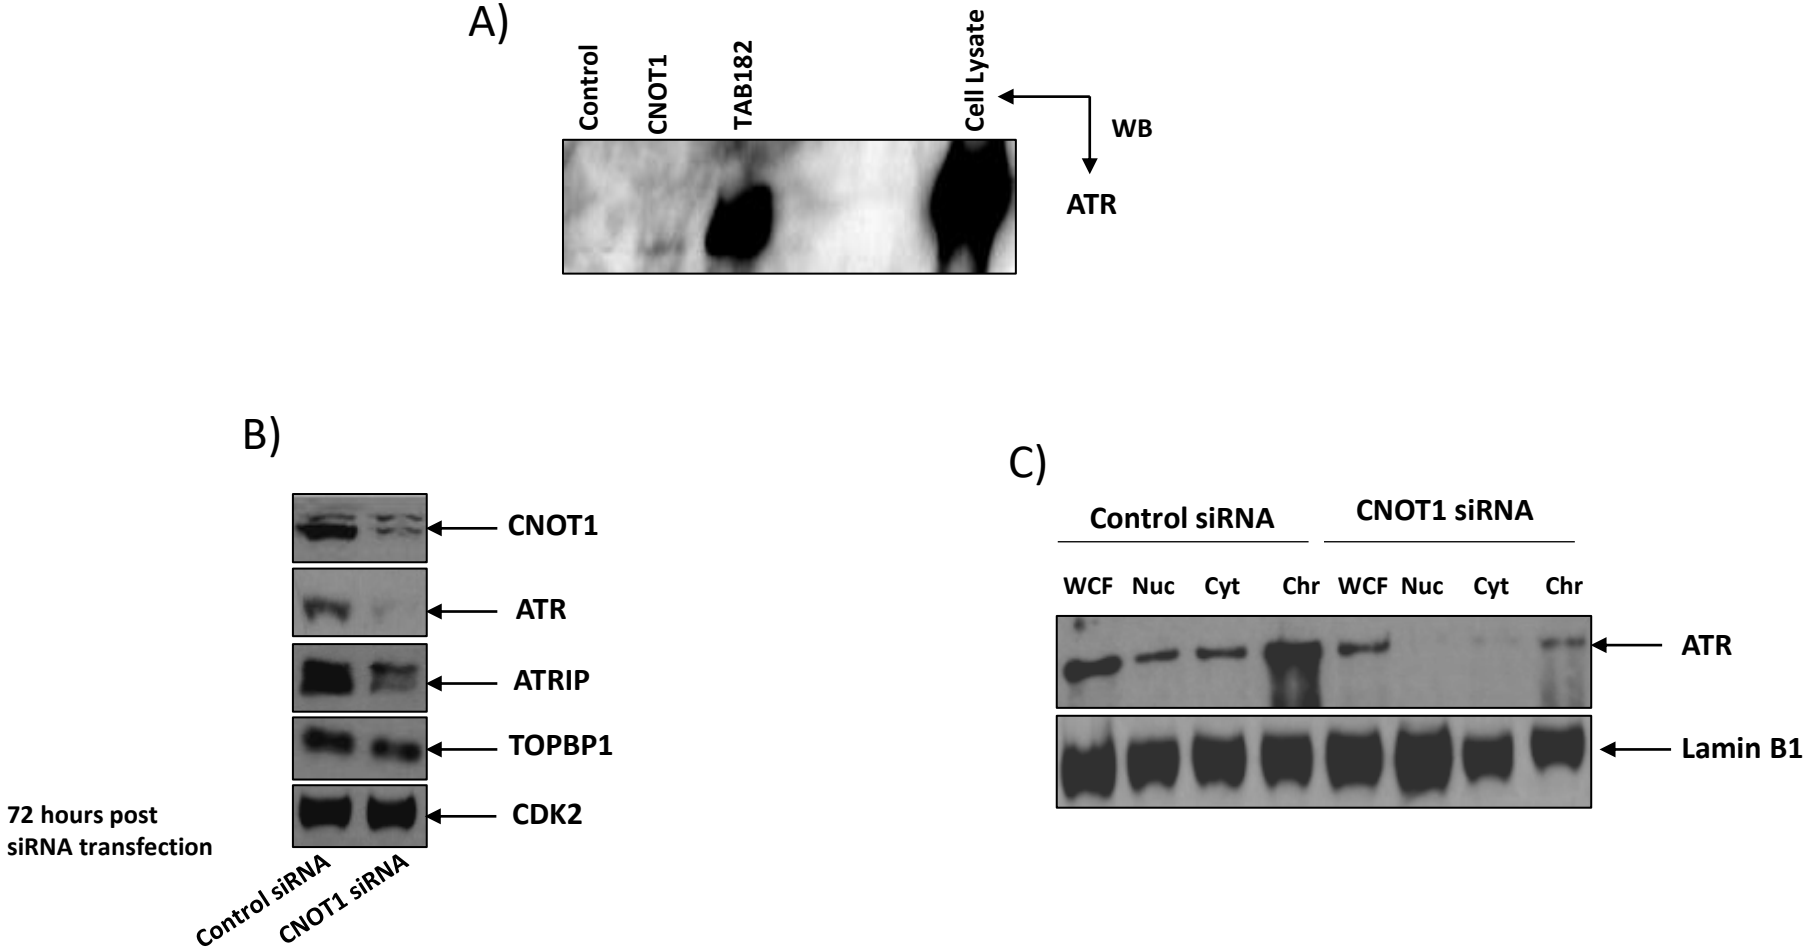



Supplementary Figure S8

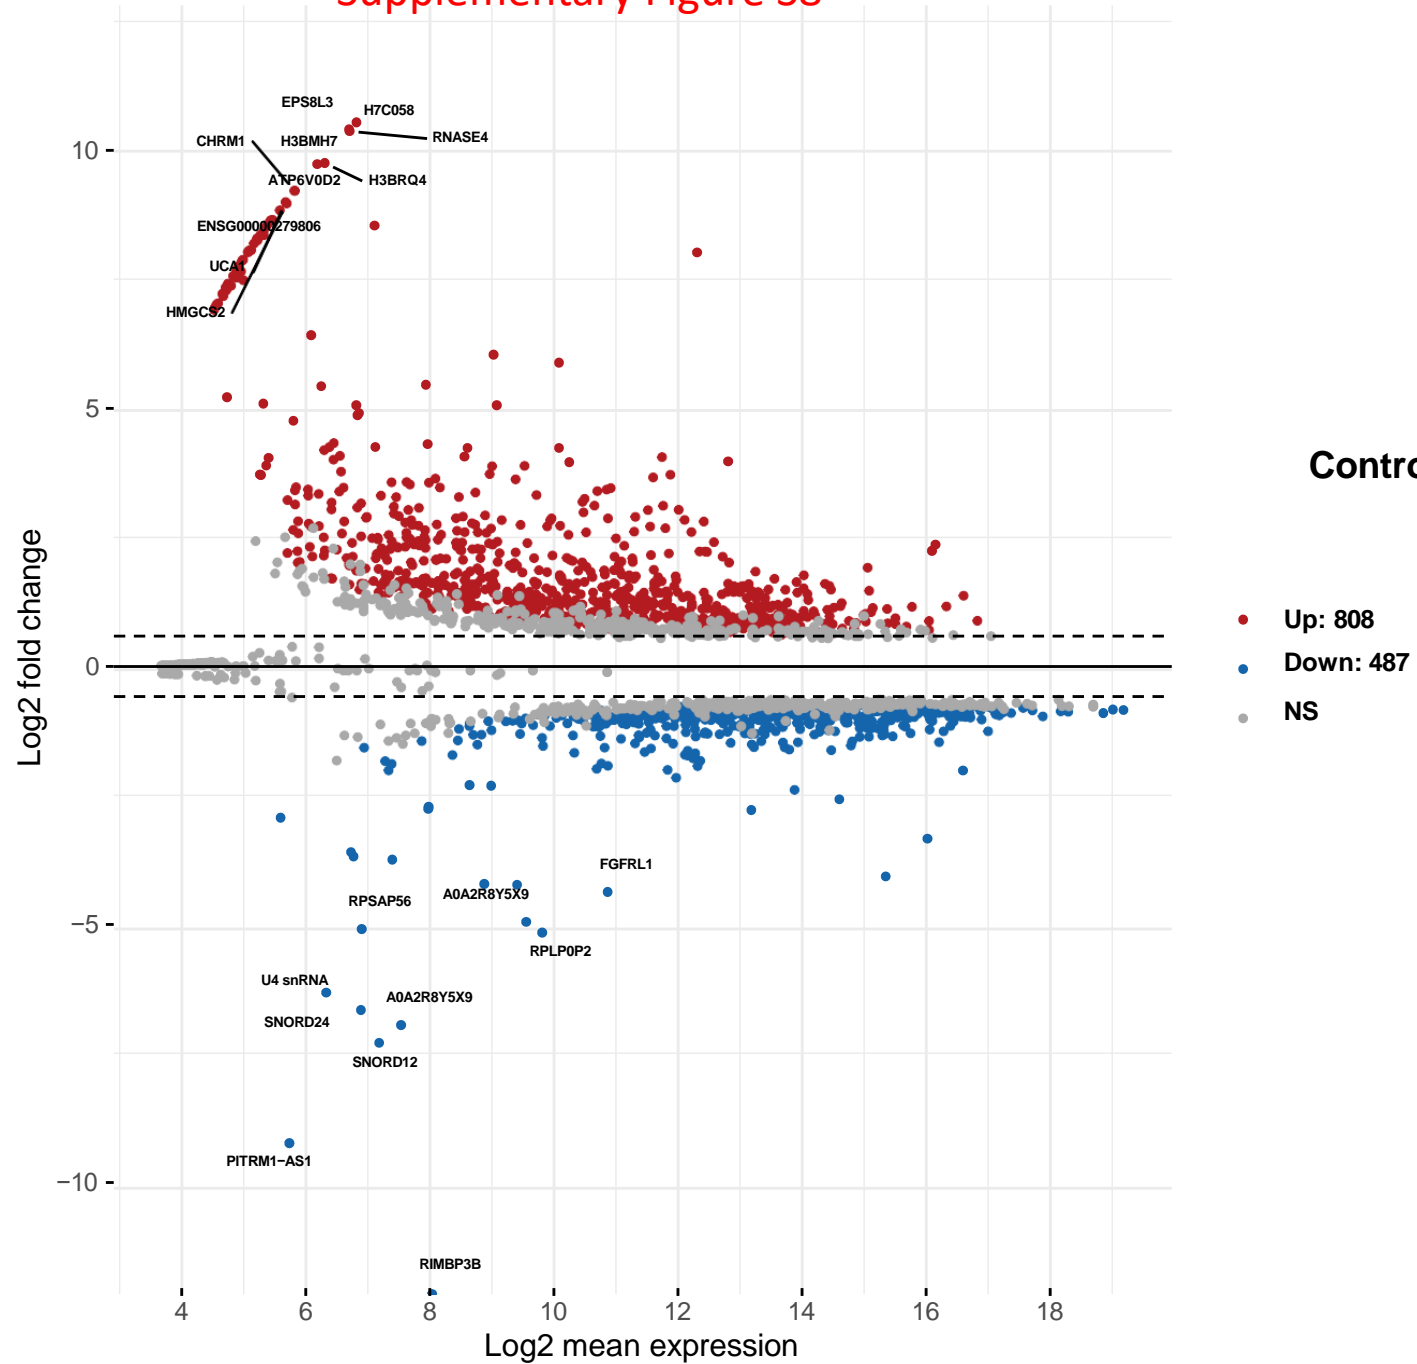

# Supplementary Figure S9

## A) Control siRNA

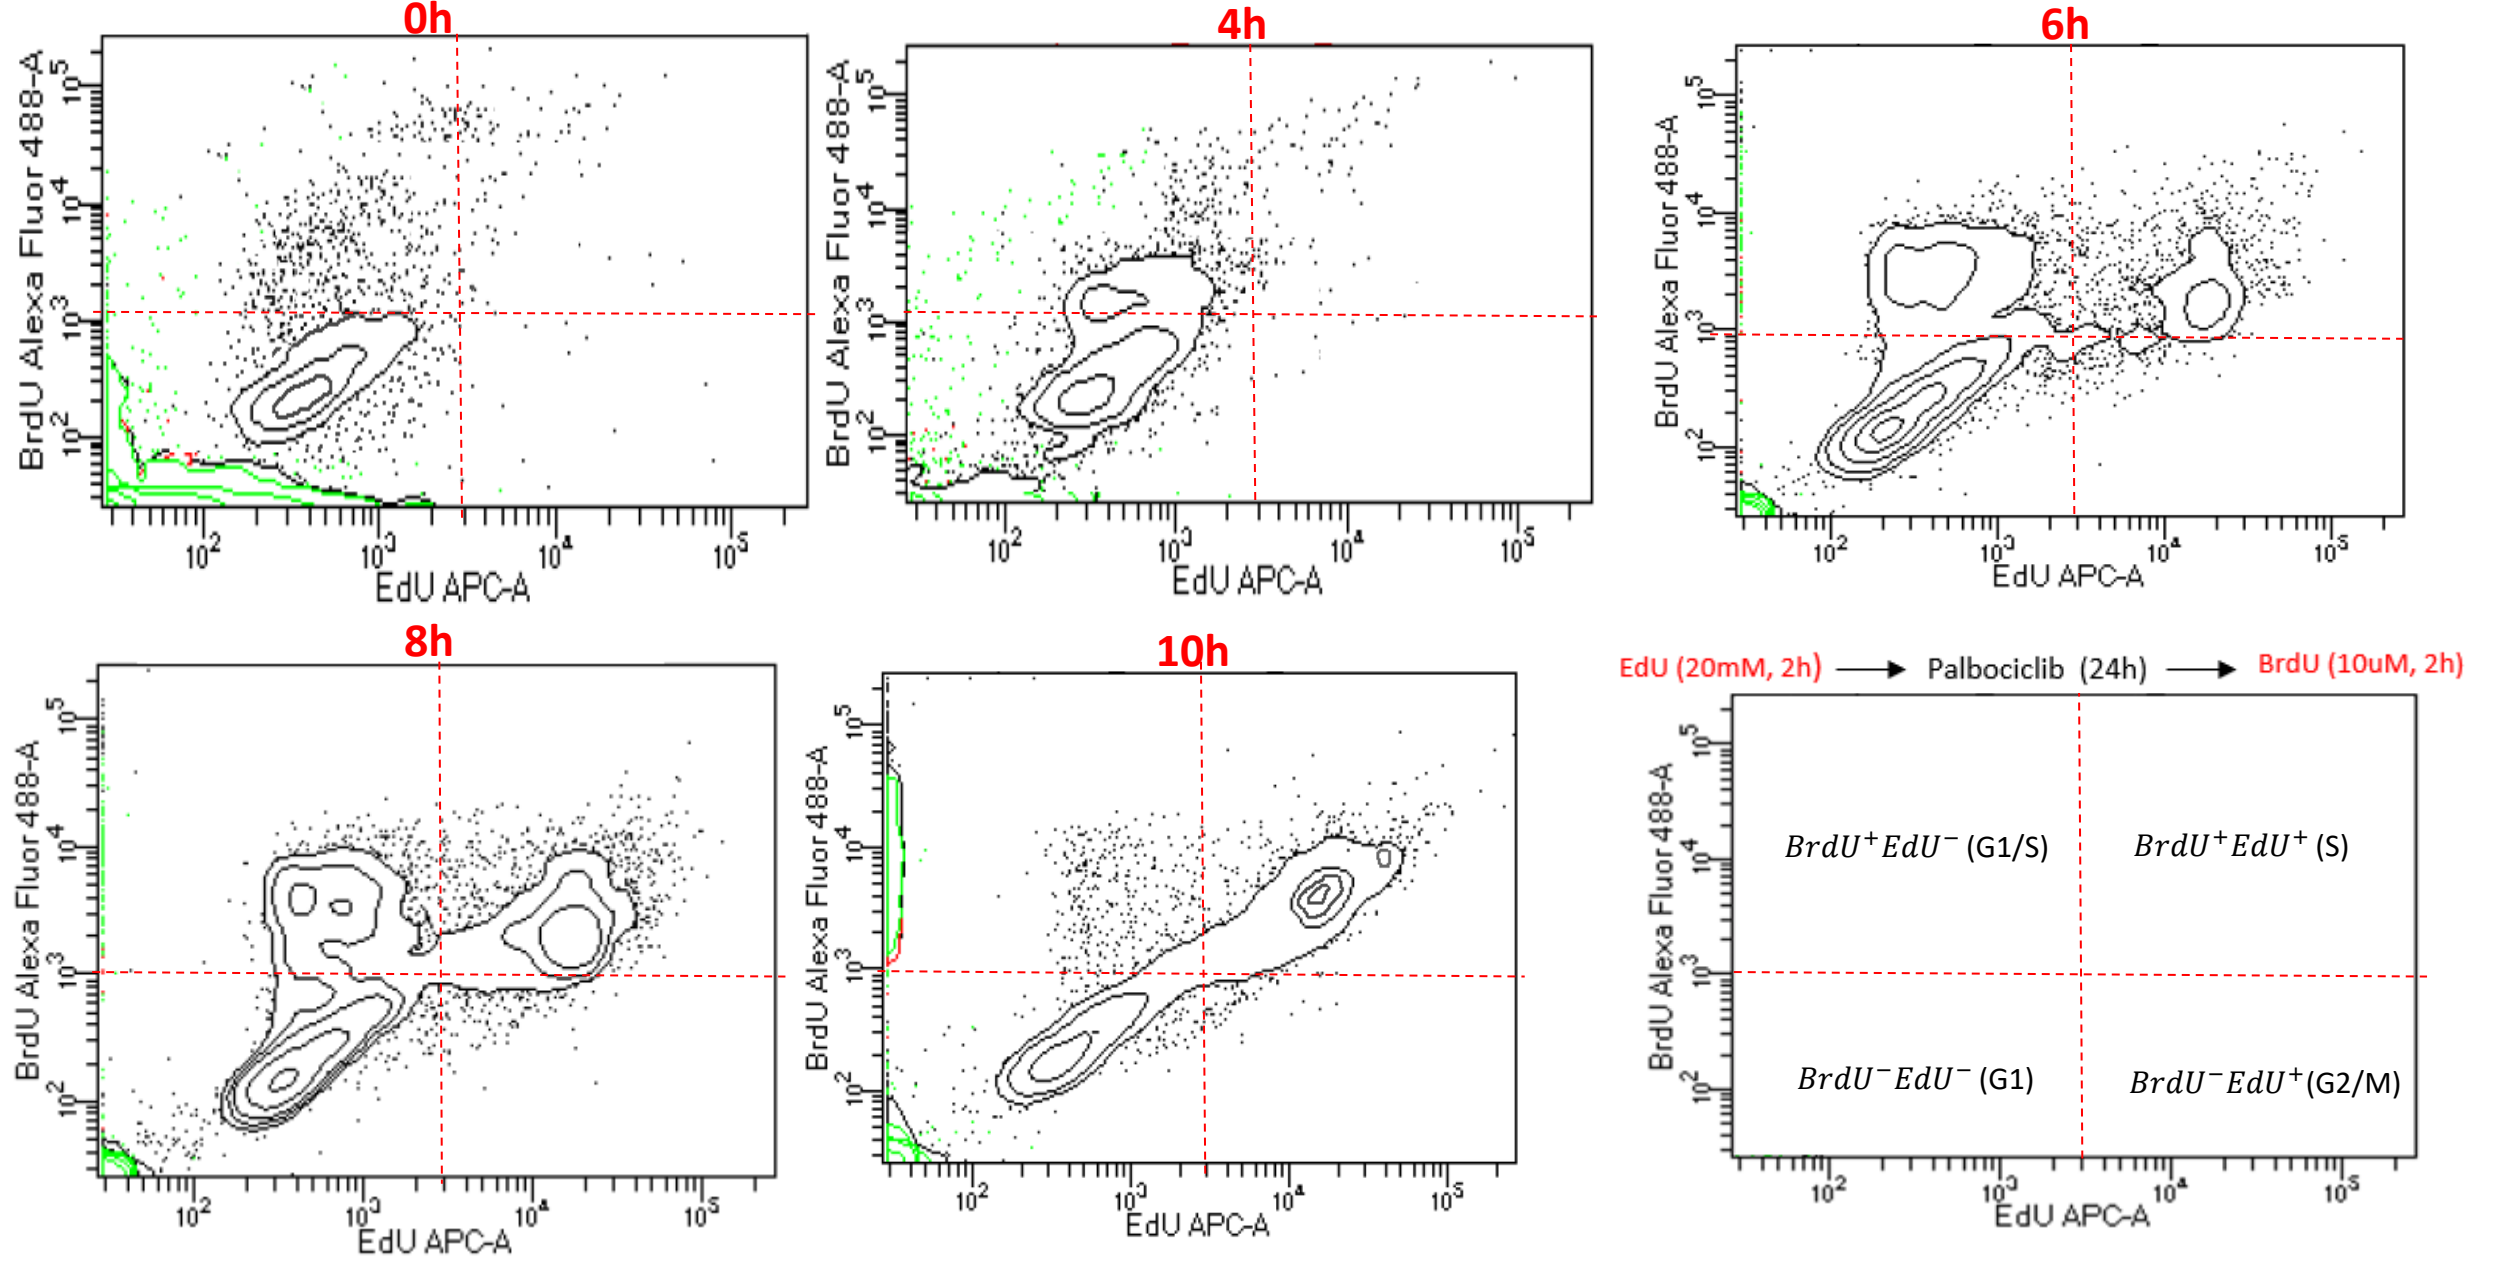

# Supplementary Figure S9

## B) CNOT1 siRNA

0h

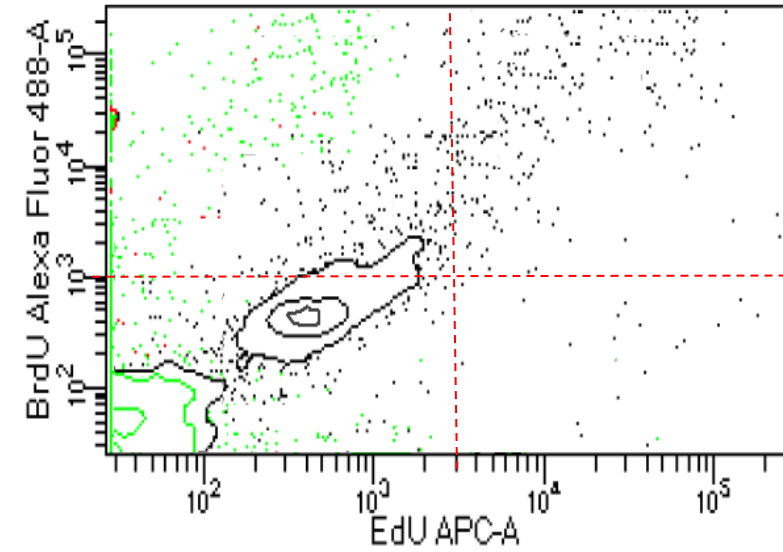

4h

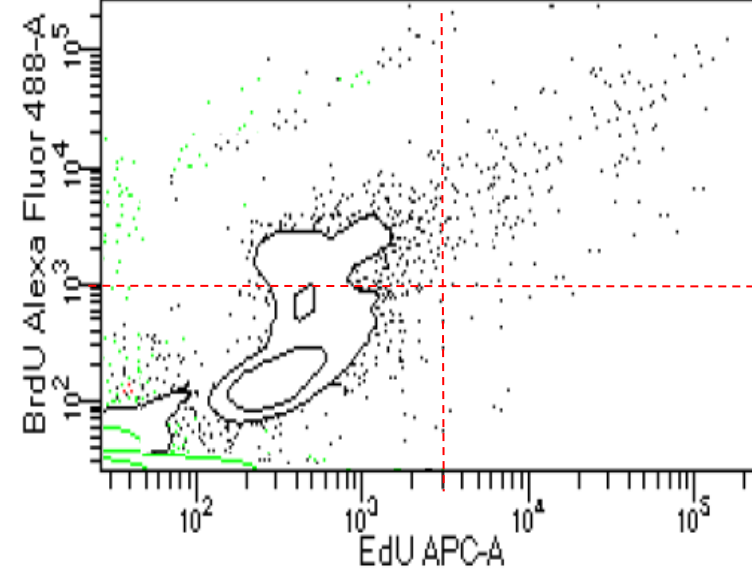

6h

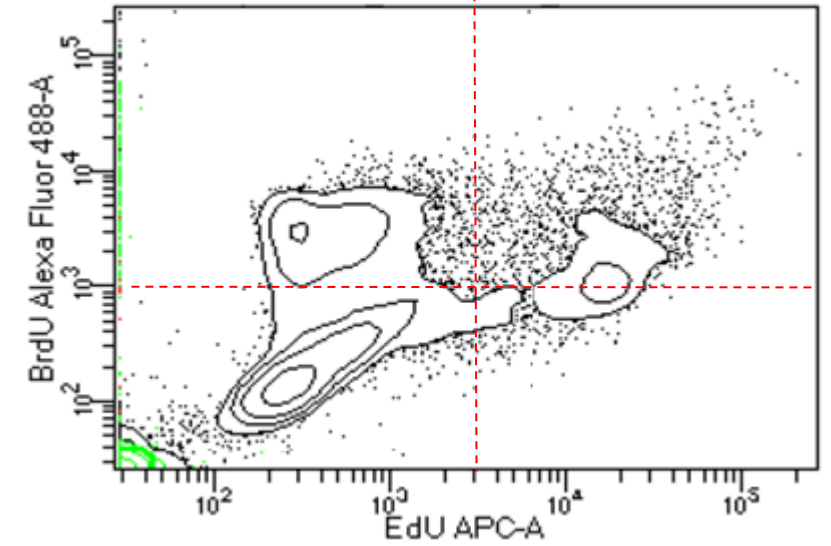

8h

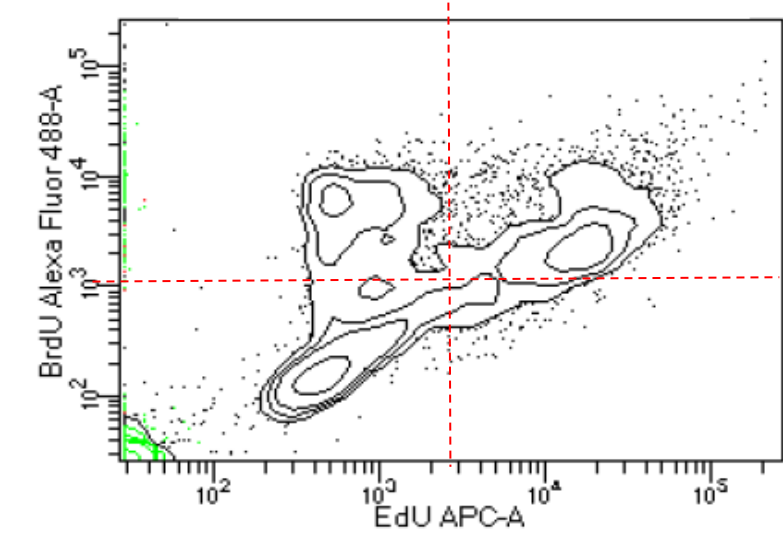

10h

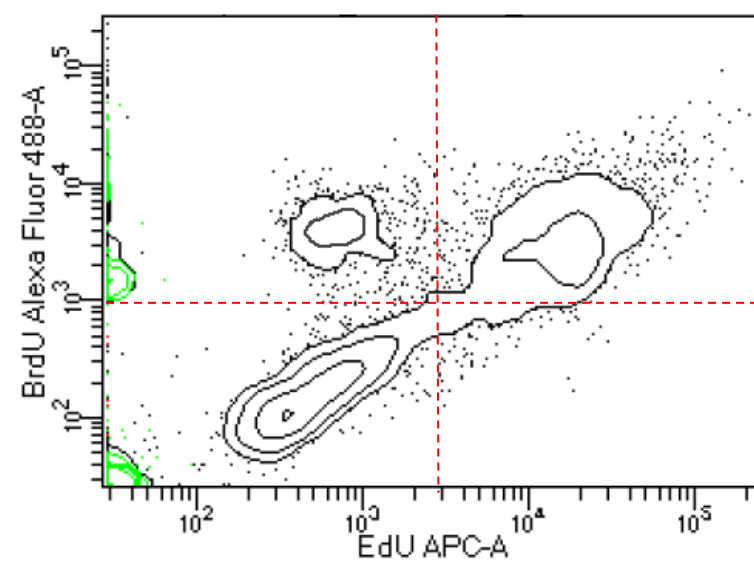

## C)

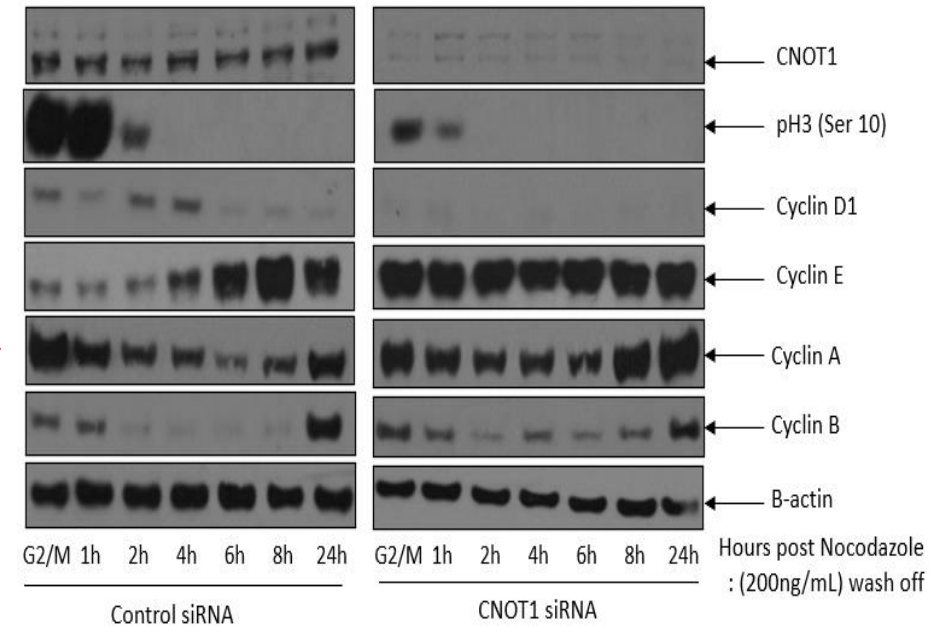

## Supplementary Figure S10

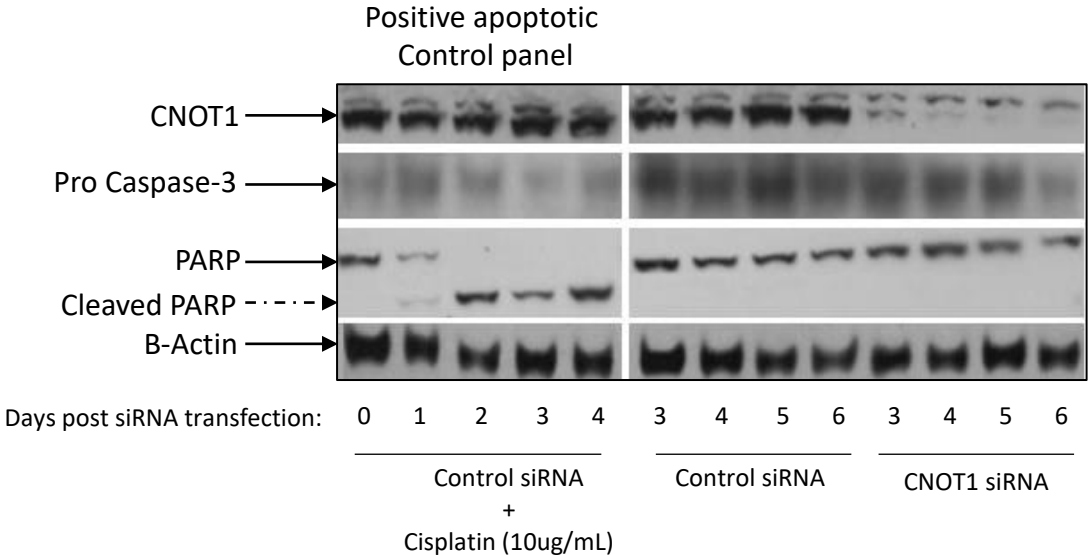

Supplement: s1 [file s1]
